# **Virulence patterns of oat crown rust in Australia - season 2022**

Eva C. Henningsen<sup>1,2</sup>, David Lewis<sup>1</sup>, Duong T. Nguyen<sup>1,3</sup>, Jana Sperschneider<sup>1</sup>,  
Shahryar F. Kianian<sup>4</sup>, Eric Stone<sup>2,5</sup>, Peter N. Dodds<sup>1</sup>, Melania Figueroa<sup>1</sup> †

<sup>1</sup>Agriculture and Food, Commonwealth Scientific and Industrial Research

Organisation, Canberra, ACT, 2601, Australia

<sup>2</sup>Research School of Biology, The Australian National University, Canberra, ACT,  
2601, Australia.

<sup>3</sup>Agriculture and Food, Commonwealth Scientific and Industrial Research

Organisation, Adelaide, SA, 5064, Australia

<sup>4</sup>Cereal Disease Laboratory, Agricultural Research Service, US Department of  
Agriculture, St. Paul, MN, USA

<sup>5</sup>Biological Data Science Institute, The Australian National University, Canberra,  
ACT, 2601, Australia.

† Corresponding author: M. Figueroa, [melania.figueroa@csiro.au](mailto:melania.figueroa@csiro.au)

**Keywords:** virulence, rust, oat, race, resistance, disease

## **Funding**

This work was jointly funded by the Grains Research and Development Corporation (GRDC) and CSIRO, project grant CSP2204-007RTX. EH was supported by the ANU University Research Scholarship and Digital Agriculture PhD Supplementary Scholarship.

## 26 **Abstract**

27 *Puccinia coronata* f. sp. *avenae* (*Pca*) is an important foliar pathogen of oat which  
 28 causes crown rust disease. The virulence profile of 48 *Pca* isolates derived from  
 29 different locations in Australia was characterised using a collection of oat lines often  
 30 utilised in rust surveys in the USA and Australia. This analysis indicates that *Pca*  
 31 populations in Eastern Australia are broadly virulent, in contrast to the population in  
 32 Western Australia (WA). Several oat lines/*Pc* genes are effective against all rust  
 33 samples collected from WA, suggesting they may provide useful resistance in this  
 34 region if deployed in combination. We identified 19 lines from the USA oat differential  
 35 set that display disease resistance to *Pca* in WA, some in agreement with previous  
 36 rust survey reports. We adopted the 10-letter nomenclature system to define oat  
 37 crown rust races in Australia and compare the frequency of those virulence traits to  
 38 published data from the USA. Based on this nomenclature, 42 unique races were  
 39 detected among the 48 isolates, reflecting the high diversity of virulence phenotypes  
 40 for *Pca* in Australia. Nevertheless, the *Pca* population in the USA is substantially  
 41 more broadly virulent than that of Australia. Close examination of resistance profiles  
 42 for the oat differential set lines after infection with *Pca* supports hypotheses of  
 43 allelism or redundancy among *Pc* genes or the presence of several resistance genes  
 44 in some oat differential lines. These findings illustrate the need to deconvolute the  
 45 oat differential set using molecular tools.

## 46 **Manuscript body**

47 Oat crown rust disease is caused by the basidiomycete fungus *Puccinia*  
 48 *coronata* f. sp. *avenae* (*Pca*) (Nazareno et al. 2018). This disease is prevalent in oat  
 49 growing regions across Australia and worldwide, raising the profile of this pathogen  
 50 as one of global importance. Oat is important to Australia's economy as it is used for  
 51 milling, grazing, and feed hay (Cowman et al. 2021). Australia has a leading position  
 52 in the production of high-quality milling oats, and in the 2021-2022 cropping season  
 53 produced 1.7 million tonnes of oat (Australian Bureau of Statistics 2021). Regions  
 54 known for their production of milling oat include Western Australia (WA), the Eyre  
 55 and York Peninsulas of South Australia (SA), Western and North-eastern Victoria  
 56 (VIC), and the Riverina and Central New South Wales (NSW). Forage oats are  
 57 widely grown in Central and South Queensland (QLD) and Northern NSW and to  
 58 some extent in WA. Oat production in WA is heavily focused on grain for feed and  
 59 hay. It is estimated that 48% of Australia's hay export comes from WA alone (Troup  
 60 2017). Given the negative impact of crown rust on plant growth, yield, grain weight,  
 61 and palatability, the natural populations of *Pca* must be closely monitored to detect  
 62 changes in virulence traits. The recent increases in market demand for Australian  
 63 oats have justified additional research and development investments to support the  
 64 industry (Cowman et al. 2021).

65 The evolution of virulence in *Pca* is driven by an arms race between the  
 66 pathogen and the host (Nazareno et al. 2018). The boom-and-bust cycle illustrates  
 67 this process, as the pressure exerted by the extensive adoption of an oat cultivar  
 68 with a disease resistance (*R*) gene leads to the selection of rare variants in the  
 69 pathogen that can overcome that specific resistant trait. This results in a frequency  
 70 increase of that virulence trait in the rust population (Figueroa et al. 2023).

71 Consequently, planting of that oat cultivar may become less common, as it is no  
72 longer resistant to the pathogen. Oat resistance to *Pca* follows the gene-for-gene  
73 concept initially described by Flor (1971), which is now more broadly understood to  
74 involve recognition of the pathogen by the plant immune system (Dodds 2023; Pitsili  
75 et al. 2020). Plant *R* genes generally encode intracellular immune receptor proteins  
76 mostly belonging to the nucleotide binding leucine rich repeat receptor (NLR) class.  
77 These receptors recognise pathogen 'effector' proteins, known as virulence (Avr)  
78 factors, that are delivered into host cells during infection to suppress host basal  
79 defences and facilitate infection (Figueroa et al. 2021; Petre et al. 2014). This type of  
80 resistance is known as race-specific resistance, which provides the framework  
81 utilised by plant pathologists to nominate races (pathotypes) of a pathogen. These  
82 pathogen races represent specific virulence profiles on a set of selected cultivars  
83 that collectively are referred to as a host differential set. At the molecular level, it is  
84 the combination of Avr factors (effectors) that defines a race. Each of the differential  
85 cultivars preferably contains a single race-specific *R* gene; however, that is often  
86 difficult to achieve due to the time commitment and investment required to generate  
87 isogenic lines and develop molecular markers to ensure *R* gene presence. Oat  
88 differential sets are used extensively to categorise *Pca* races (pathotypes) but differ  
89 substantially in their composition in different regions (Carson 2011; Chong et al.  
90 2000; Nazareno et al. 2018).

91 Through a network of plant pathologists and industry representatives, we  
92 received and processed samples for 48 *Pca* isolates derived from oat producing  
93 areas in Australia (WA:20, NSW:11, VIC:9, SA:4, QLD:4) to investigate the virulence  
94 landscape of this pathogen in the country and create a foundational resource for  
95 future studies (**Table 1**). Rust samples were received as infected foliar tissue

material and recovered by inoculation onto the widely susceptible cultivars Swan or Marvelous. Single pustule isolates were collected and amplified using standard techniques to determine virulence profiles (Miller et al. 2020). Rust isolate stocks are kept at  $-80^{\circ}\text{C}$  for long term storage. Presently, there is no universal oat differential set or nomenclature system to facilitate an international monitoring system. Thus, we adopted an oat differential set utilised for annual rust surveys in the USA and added several oat cultivars that are often included in rust surveys conducted by Australian Cereal Rust Control Programme (**Table S1**). Oat lines from the USA were imported from the USDA-ARS (St. Paul, MN, USA) to the CSIRO's quarantine facility (Black Mountain Laboratories, Canberra, Australia). The remaining oat lines were accessed through the Australian Grains Genebank (AGG) or breeders. A single seed descent increase was undertaken for each oat line using standard growth conditions; briefly, plants were grown at  $23^{\circ}\text{C}$  for 16 hours light and  $18^{\circ}\text{C}$  for 8 hours dark and fertilized at stem elongation and anthesis with Osmocote® 19-9-10+2MgO+TE all-purpose slow release (Everris International B.V., Heerlen, Netherlands). To determine virulence profiles, *Pca* isolates were inoculated onto the differential lines and infection scores were recorded at 12 dpi with race assignments (pathotypes) made using the North American 16-letter code (Carson 2011; Chong et al. 2000; Nazareno et al. 2018). Infection scores were converted to a 0-9 numeric scale for statistical comparisons (Table S2) (Miller et al. 2018, 2020).

Overall, the *Pca* population from Eastern Australia (NSW, QLD, VIC, and SA) is more virulent compared to the population in Western Australia (**Figure 1A**; **Table S2**; Wilcoxon test  $p = 6.7 \times 10^{-8}$ ). Collectively, *Pca* isolates from WA are only virulent on 21 of 40 USA differential lines, while isolates from Eastern Australia have virulence to 38 of 40 USA differential lines (**Figure 1B**). We identified 19 lines from

the USA differential set that display resistance to all the *Pca* isolates collected from WA. Virulence to 18 lines, including Pc91, Pc94, and Pc96, was only sampled in Eastern Australia. Across the 31 USA differential lines with designated *Pc* genes, the most broadly virulent isolates were from eastern Australia (22QLD118, 22NSW103, 22NSW79), while the least broadly virulent isolates were from across Australia (22NSW107, 22WA53, 22WA86) (**Figure 1B**). Rust isolates from QLD had the highest average virulence on this subset, (5.50), followed by those from NSW (4.60), VIC (4.32), SA (4.29), with those from WA being least virulent on average (3.75) (**Table S2**). We obtained 42 unique 10-letter races for the entire *Pca* collection (48 isolates), illustrating the phenotypic diversity of the pathogen in Australia (**Table 1**).

Virulence scores on 19 of the 40 USA differential lines can be compared with survey information from the Australian Cereal Rust Program (ACRCP) as they have been included in previous surveys (**Table S1**) (Australian Cereal Rust Survey 2020, 2021, 2022; Cuddy et al. 2016; Cuddy and Park 2014; Park 2013; Park and Kavanagh 2002, 2003, 2008, 2009, 2011; Park and Whale 1999). Of these, disease resistance scoring on 13 lines are consistent with reports from 1998-2022 by the ACRCP (Pc36, Pc39, Pc46, Pc50, Pc51, Pc56, Pc59, Pc61, Pc64, Pc68, Pc91, H548, WIX4361-9). Historically, virulence was detected in all 19 lines in Eastern Australia, but our study did not sample virulence for the Pc58 or Pc63 lines in this region (Cuddy et al. 2016; Cuddy and Park 2014; Park and Kavanagh 2009). We identified 12 lines which were resistant to all of the WA isolates in our sample, eight of which agree with historic survey records (Pc36, Pc50, Pc56, Pc59, Pc63, Pc68, Pc91, WIX4361-9), since virulence to these lines has never been recorded in WA. Virulence to the other four oat lines (Pc38, Pc52, Pc55, Pc71) has only been

detected rarely in WA (Australian Cereal Rust Survey 2021, 2022; Park 2000), which may explain why no virulence was detected in this limited sample.

We also tested 17 oat lines often included as part of the ACRCP oat crown rust surveys (Brake et al. 2001; Park 2013). Six of these (Swan, Ukraine, Santa Fe, Trispermia, Bondvic, Landhafer) were susceptible to most *Pca* isolates from all Australian states. The *Pc* genes postulated to exist in these lines include *Pc3c+Pc4c*, *Pc4*, *Pc5*, *Pc6*, *Pc6c*, *Pc6d*, *Pc7*, *Pc8*, *Pc9*, and *Pc21*, which were deployed in the field more than 50 years ago (Nazareno et al. 2018; Simons 1985). As such, these lines are not viable sources of crown rust resistance and could be excluded from future crown rust surveys. Importantly, among the Australian lines, the cultivar Barcoo was the only genotype that was effective against all examined *Pca* isolates. However, according to historic records *Pca* overcame Barcoo's resistance in 2001 (Park 2013), although this virulence trait seems to exist at a low frequency (only 1 or 2 samples each year) in NSW and QLD populations (Park 2013; Park and Wellings 2010; Park et al. 2022). There were eight other cultivars that displayed resistance to all WA isolates (Culgoa, Bettong, Cleanleaf, Saia, Volta, Warrego, Genie, Gwydir), consistent with survey data which detected no virulence to these lines in WA isolates (Australian Cereal Rust Survey 2020, 2021, 2022). The oat cultivar Cleanleaf is postulated to carry genes *Pc38*, *Pc39*, and *Pc52* (Park 2013), so our findings are consistent as we did not detect virulence on the *Pc38* or *Pc52* lines when testing *Pca* isolates from WA. However, the first report of crown rust virulence to Cleanleaf in eastern Australia (NSW and QLD) dates back to 1995 (Park et al. 2000). Similarly rust survey records indicate that virulence for cultivar Warrego was first identified in 1998, and in 2001 virulence on Gwydir and Bettong also emerged (Park 2013). Virulence on cultivars Genie and Volta are reported for years 2008 and 2010,

respectively. These virulence traits are present in the pathogen populations of eastern Australia; therefore, it is possible for their frequency to increase or for virulent isolates to migrate to the west of the country.

Finally, we compared the phenotypic data for the Australian *Pca* isolates to data for 152 USA isolates collected between 2015-2018 (Hewitt et al. 2023; Miller et al. 2020) to compare with Australian data. As illustrated by the violin plots (**Figure 1A**), the 2022 Australian *Pca* collection is significantly less virulent than the USA collection from 2015-2018 (mean virulence 3 and 7.5, respectively; Wilcoxon test  $p < 2.2 \times 10^{-16}$ ). By comparing virulence profiles between Australian *Pca* in this study and *Pca* from the USA (Hewitt et al. 2023; Miller et al. 2020), we noted that certain differential lines have already lost resistance in the USA but were still mostly effective in Australia (WIX4361-9, Belle, Stainless). Furthermore, the oat differential lines named Pc94 and Leggett, which is postulated to carry Pc68 and Pc94, still exhibit broad resistance in both countries at present, although we expect virulence evolution is already occurring in both the USA and Australia due to evolutionary pressure exerted by the use of these *R* genes.

Two GWAS analyses of virulence in *Pca* have indicated complex relationships among *Pc* genes represented in the oat differential sets (Hewitt et al. 2023; Miller et al. 2020). Noticeably, we observed highly similar resistance profiles for Pc39, Pc38, Pc55, Pc70, and Pc71 in our infection assays. Previously, the *R* genes *Pc39*, *Pc55*, and *Pc71* have been postulated as being either allelic or the same gene by various authors (Chong and Seaman 1989; Kiehn et al. 1976; Leonard et al. 2005). Moreover, GWAS results (Hewitt et al. 2023; Miller et al. 2020) for USA *Pca* isolates detected virulence associations for Pc38, Pc39, Pc55, Pc63, Pc70, and Pc71 in the same genomic interval, suggesting that some of the immunoreceptors encoded by



these genes recognise the same *Avr* effector or genetically linked *Avr* effectors. Thus, data derived from the Australian *Pca* infections is consistent with this scenario. Furthermore, our results support the hypothesis by Hewitt et al. (2023) that the oat differential lines Pc62 and Pc64 carry alleles of the same *R* gene as the resistance profiles of these lines have overlap suggesting allelism as observed in the USA *Pca* population. The resistance phenotypes of the lines Pc35 and Pc58 also agree with the results from Hewitt et al. (2023), suggesting that the oat lines Pc58 and Pc35 carry one *R* gene in common and the Pc58 line contains at least one additional *R* gene. As highlighted previously by Hewitt et al. (2023), we also observed consistency between the resistance profiles of the oat differential line Pc91 and the oat cultivar Hi-Fi, which was derived from Amagalon, the original source of *Pc91* (McMullen et al. 2005). In summary, our findings provide additional motivation for the need to develop an oat differential set that clearly differentiates among *R* genes and eliminates redundancy.

The expansion of the oat crown rust collection in the coming years coupled with population genomics analysis will provide an accurate representation of the pathogen's genetic diversity. Recent advances in generating genome references of *Pca* (Miller et al. 2018) including a nuclear-phased chromosome-level assembly (Henningsen et al. 2022) provide a strong foundation to study the genetic relationships of these isolates. Such information will be instrumental in determining the factors contributing to host adaptation of *Pca* in Australia. Rust fungi are known to evolve virulence by mutation, reassortment of virulence alleles, and somatic hybridisation (Figuerola et al. 2020). The invasive species *Rhamnus cathartica*, also known as common buckthorn, acts as an alternate host for *Pca* and allows sexual reproduction (Nazareno et al. 2018). Several studies (Berlin et al. 2018; Hewitt et al.

2023; Miller et al. 2020; Zhao et al. 2016) document the influence of sexuality in the diversity of the oat crown rust pathogen. In Australia, a sexual host for *Pca* has not been reported (Burdon and Thrall 2008), so sexual reproduction is not expected to play a role in the evolution of *Pca* in Australia, suggesting the Australian population is evolving by clonality and stepwise mutation. Wild oats are abundant in the Australian landscape and serve as an additional host for *Pca*, which is predicted to favour mutations and contribute to the emergence of diversity (Burdon and Thrall 2008). However, it is not possible to define lineages from the phenotypic data alone; more detailed genotypic analysis will be required to fully characterize the number and diversity of clonal lineages present in the Australian *Pca* population.

The findings from this study, along with recent research (Hewitt et al. 2023; Miller et al. 2020) highlight the importance in developing durable crown rust resistance in oat. This can be achieved by stacking the most current effective genes, including both APR (Adult Plant Resistance) and ASR (All Stages Resistance) (Periyannan et al. 2017) and identifying and integrating novel sources of resistance into the oat breeding pools (Figueroa et al. 2020; Klos et al. 2017; Nazareno et al. 2018, 2023).

## 237 **Acknowledgments**

238 We thank Ben Trevaskis and Meredith McNeil at CSIRO, as well as Bruce Winter at  
239 the Department of Agriculture and Fisheries (Queensland) for supplying seed for the  
240 oat cultivars Cleanleaf, Gwydir, Warrego, Barcoo, and Genie. We would also like to  
241 thank Liza Apps for technical support at the CSIRO's Quarantine facility. Finally, we  
242 also thank Allan Rattey (InterGrain), Mark McLean (Agriculture Victoria), Hari Dadu  
243 (Agriculture Victoria), Ciara Beard (DPIRD WA<sup>1</sup>), Kylie Chambers (DPIRD WA),  
244 Andrea Hills (DPIRD WA), Jason Bradley (DPIRD WA), Joel Kidd (DPIRD WA), Tara  
245 Garrard (SARDI<sup>2</sup>), Brad Baxter (NSW DPI<sup>3</sup>), Mia Bowen Osmond (Palafor Partners  
246 Pty. Ltd.), Lee Hickey (University of Queensland), and Peter Dracatos (La Trobe  
247 University) and their organizations for contributing samples to the collection used in  
248 this study.

249 <sup>1</sup> Department of Primary Industries and Regional Development, WA

250 <sup>2</sup> South Australian Research and Development Institute

251 <sup>3</sup> New South Wales Department of Primary Industries

## Literature Cited

- Agricultural Commodities, Australia. 2023. Australian Bureau of Statistics.  
<https://www.abs.gov.au/statistics/industry/agriculture/agricultural-commodities-australia/latest-release>  
 Australian Cereal Rust Survey. 2020. Plant Breeding Institute, University of Sydney.  
<https://www.google.com/maps/d/viewer?mid=1VZPy5uGhC9RXfgp4TUuwHEm0H8QXRSWJ&ll=-32.93953349389678%2C122.88331689066194&z=7>  
 Australian Cereal Rust Survey. 2021. Plant Breeding Institute, University of Sydney.  
<https://www.google.com/maps/d/viewer?mid=17k2hAS9ProHR8c9DiAPIWJEUeoy5WLM&ll=-30.936465508880048%2C121.47685631082572&z=7>  
 Australian Cereal Rust Survey. 2022. Plant Breeding Institute, University of Sydney.  
[https://www.google.com/maps/d/viewer?mid=1qzwnH1u0B2apVvpkEKFm0mfBP\\_7cBknF&ll=-28.28748075112555%2C133.1960683213396&z=6](https://www.google.com/maps/d/viewer?mid=1qzwnH1u0B2apVvpkEKFm0mfBP_7cBknF&ll=-28.28748075112555%2C133.1960683213396&z=6)  
 Berlin, A., Wallenhammar, A. C., and Andersson, B. 2018. Population differentiation of *Puccinia coronata* between hosts –implications for the epidemiology of oat crown rust. Eur. J. Plant Pathol. 152:901–907.  
 Brake, V. M., Irwin, J. A. G., and Park, R. F. 2001. Genetic variability in Australian isolates of *Puccinia coronata* f. sp. *avenae* assessed with molecular and pathogenicity markers. Australas. Plant Pathol. 30:259–266.  
 Burdon, J. J., and Thrall, P. H. 2008. Pathogen evolution across the agro-ecological interface: implications for disease management. Evol. Appl. 1:57–65.  
 Carson, M. L. 2011. Virulence in oat crown rust (*Puccinia coronata* f. sp. *avenae*) in the United States from 2006 through 2009. Plant Dis. 95:1528–1534.  
 Chong, J., Leonard, K. J., and Salmeron, J. J. 2000. A North American system of nomenclature for *Puccinia coronata* f. sp. *avenae*. Plant Dis. 84:580–585.

277 Chong, J., and Seaman, W. L. 1989. Virulence and distribution of *Puccinia coronata*  
278 in Canada in 1988. Can. J. Plant Pathol. 11:439–442.

279 Chong, J., and Zegeye, T. 2004. Physiologic specialization of *Puccinia coronata* f.  
280 sp. *avenae*, the cause of oat crown rust, in Canada from 1999 to 2001. Can. J. Plant  
281 Pathol. 26:97-108.

282 Cowman, S., Cox, B., Yamamoto, M., and Kingwell, R. 2021. *Opportunities and risks*  
283 *for the Australian oats industry*. Australian Export Grains Innovation Centre.

284 Cuddy, W., and Park, R. F. 2014. Cereal rust situation update, October 2014. Cereal  
285 Rust Report 12(4). Plant Breeding Institute, University of Sydney.

286 Cuddy, W., Park, R. F., and Singh, D. 2016. Cereal rust situation, September 2016.  
287 Cereal Rust Report 14(7). Plant Breeding Institute, University of Sydney.

288 Dodds, P. N. 2023. From gene-for-gene to resistosomes: Flor's enduring legacy.  
289 MPMI. 36(8):461-467.

290 Figueroa, M., Dodds, P. N., and Henningsen, E. C. 2020. Evolution of virulence in  
291 rust fungi — multiple solutions to one problem. Curr. Opin. Plant Biol. 56:20–27.

292 Figueroa, M., Dodds, P. N., Henningsen, E. C., and Sperschneider, J. 2023. Global  
293 landscape of rust epidemics by *Puccinia* species: Current and future perspectives. In  
294 *Plant Relationships: Fungal-Plant Interactions*, eds. Barry Scott and Carl Mesarich.  
295 Cham: Springer International Publishing, p. 391–423.

296 Figueroa, M., Ortiz, D., and Henningsen, E. C. 2021. Tactics of host manipulation by  
297 intracellular effectors from plant pathogenic fungi. Curr. Opin. Plant Biol. 62:102054

298 Flor, H. H. 1971. Current status of the gene-for-gene concept. Annu. Rev.  
299 Phytopathol. 9:275–296.

300 Gu, Z., Eils, R., and Schlesner, M. 2016. Complex heatmaps reveal patterns and  
301 correlations in multidimensional genomic data. Bioinformatics. 32:2847–2849.

302 Henningsen, E. C., Hewitt, T., Dugyala, S., Nazareno, E. S., Gilbert, E., Li, F.,  
303 Kianian, S. F., Steffenson, B. J., Dodds, P. N., Sperschneider, J., and Figueroa, M.  
304 2022. A chromosome-level, fully phased genome assembly of the oat crown rust  
305 fungus *Puccinia coronata* f. sp. *avenae*: a resource to enable comparative genomics  
306 in the cereal rusts. *G3*. 12(8):jkac149.

307 Hewitt, T., Henningsen, E. C., Pereira, D., McElroy, K., Nazareno, E. S., Dugyala, S.,  
308 Nguyen-Phuc, H., Li, F., Miller, M. E., Visser, B., Pretorius, Z., Boshoff, W.,  
309 Sperschneider, J., Stukenbrock, E., Kianian, S. F., Dodds, P. N., and Figueroa, M.  
310 2023. Genome-enabled analysis of population dynamics and virulence associated  
311 loci in the oat crown rust fungus *Puccinia coronata* f. sp. *avenae*. *MPMI*  
312 <https://doi.org/10.1094/MPMI-09-23-0126-FI>

313 Kiehn, F. A., McKenzie, R. I. H., and Harder, D. E. 1976. Inheritance of resistance to  
314 *Puccinia coronata avenae* and its association with seed characteristics in four  
315 accessions of *Avena sterilis*. *Can. J. Genet. Cytol.* 18(4):717-726

316 Klos, K. E., Yimer, B. A., Babiker, E. M., Beattie, A. D., Bonman, J. M., Carson, M.  
317 L., Chong, J., Harrison, S. A., Ibrahim, A. M. H., Kolb, F. L., McCartney, C. A.,  
318 McMullen, M., Fetch, J. M., Mohammadi, M., Murphy, J. P., and Tinker, N. A. 2017.  
319 Genome-wide association mapping of crown rust resistance in oat elite germplasm.  
320 *The Plant Genome*. 10(2).

321 Leonard, K. J., Huerta-Espino, J., Salmeron, J. J. 2005. Virulence of oat crown rust  
322 in Mexico. *Plant Dis.* 89(9):941-948.

323 McMullen, M. S., Doehlert, D. C., and Miller, J. D. 2005. Registration of “HiFi” oat.  
324 *Crop Sci.* 45:1664–1665.

325 Miller, M. E., Nazareno, E. S., Rottschaefer, S. M., Riddle, J., Pereira, D. D. S., Li,  
326 F., Nguyen-Phuc, H., Henningsen, E. C., Persoons, A., Saunders, D. G. O.,

327 Stukenbrock, E., Dodds, P. N., Kianian, S. F., and Figueroa, M. 2020. Increased  
328 virulence of *Puccinia coronata* f. sp. *avenae* populations through allele frequency  
329 changes at multiple putative *Avr* loci. PLoS Genet. 16:e1009291.

330 Miller, M. E., Ying, Z., Vahid, O., Jana, S., Benjamin, S., Castle, R., Palmer, J. M.,  
331 Garnica, D., Upadhyaya, N., Rathjen, J., Taylor, J. M., Park, R. F., Dodds, P. N.,  
332 Hirsch, C. D., Kianian, S. F., and Figueroa, M. 2018. *De novo* assembly and phasing  
333 of dikaryotic genomes from two isolates of *Puccinia coronata* f. sp. *avenae*, the  
334 causal agent of oat crown rust. mBio. 9:10.1128/mbio.01650-17.

335 Nazareno, E. S., Fiedler, J. D., Ardayfio, N. K., Miller, M. E., Figueroa, M., and  
336 Kianian, S. F. 2023. Genetic analysis and physical mapping of oat adult plant  
337 resistance loci against *Puccinia coronata* f. sp. *avenae*. Phytopathology. 113:1307–  
338 1316.

339 Nazareno, E. S., Li, F., Smith, M., Park, R. F., Kianian, S. F., and Figueroa, M. 2018.  
340 *Puccinia coronata* f. sp. *avenae*: a threat to global oat production. Mol. Plant Pathol.  
341 19:1047–1060.

342 Park, R. F. 2013. New oat crown rust pathotype with virulence for *Pc91*. Cereal Rust  
343 Report 11(1). Plant Breeding Institute, University of Sydney.

344 Park, R. F. 2000. Occurrence and pathogenic specialisation in *Puccinia coronata* in  
345 Australasia, 1999-2000. Oat Newsletter. 46.

346 Park, R. F., Chhetri, M., Singh, D., and Ding, Y. 2022. Cereal rust situation, August  
347 2022. Cereal Rust Report 19(2). Plant Breeding Institute, University of Sydney.

348 Park, R. F., and Kavanagh, P. 2002. *2001-2002 Cereal rust survey annual report:*  
349 *Oat leaf rust*. Plant Breeding Institute, University of Sydney.

350 Park, R. F., and Kavanagh, P. 2003. *2002-2003 Cereal rust survey annual report:*  
351 *Oat leaf rust*. Plant Breeding Institute, University of Sydney.

352 Park, R. F., and Kavanagh, P. 2008. *2007-2008 Cereal rust survey annual report:*  
353 *Oat crown rust*. Plant Breeding Institute, University of Sydney.

354 Park, R. F., and Kavanagh, P. 2009. *2008-2009 Cereal rust survey annual report:*  
355 *Oat crown rust*. Plant Breeding Institute, University of Sydney.

356 Park, R. F., and Kavanagh, P. 2011. *2010-2011 Cereal rust survey annual report:*  
357 *Oat crown rust*. Plant Breeding Institute, University of Sydney.

358 Park, R. F., Oates, J. D., and Meldrum, S. 2000. Recent pathogenic changes in the  
359 leaf (brown) rust pathogen of wheat and the crown rust pathogen of oats in Australia  
360 in relation to host resistance. *Acta Phytopathol. Entomol. Hung.* 35:387–394.

361 Park, R. F. and Wellings, C. 2010. Cereal rust situation update, late spring 2010  
362 2010. Cereal Rust Report 8(8). Plant Breeding Institute, University of Sydney.

363 Park, R. F., and Whale, M. 1999. *1998-1999 Cereal rust survey annual report: Oat*  
364 *leaf rust*. Plant Breeding Institute, University of Sydney.

365 Periyannan, S., Milne, R. J., Figueroa, M., Lagudah, E. S., and Dodds, P. N. 2017.  
366 An overview of genetic rust resistance: From broad to specific mechanisms. *PLoS*  
367 *Pathog.* 13:e1006380.

368 Petre, B., Joly, D. L., and Duplessis, S. 2014. Effector proteins of rust fungi. *Front.*  
369 *Plant Sci.* 5:416.

370 Pitsili, E., Phukan, U. J., and Coll, N. S. 2020. Cell death in plant immunity. *Cold*  
371 *Spring Harb. Perspect. Biol.* 12:a036483.

372 Simons, M. D. 1985. Crown Rust. In: *Diseases, Distribution, Epidemiology, and*  
373 *Control* (pp. 131–172). Elsevier.

374 Troup, G. 2017. Hay exports. Department of Primary Industries and Regional  
375 Development, WA. <https://www.agric.wa.gov.au/hay-production/hay-exports>



- 376 Wickham, H. 2016. *ggplot2: Elegant Graphics for Data Analysis*. New York:  
377 Springer-Verlag.
- 378 Zhao, J., Wang, M., Chen, X., and Kang, Z. 2016. Role of alternate hosts in  
379 epidemiology and pathogen variation of cereal rusts. *Annu. Rev. Phytopathol.*  
380 54:207–228.

**Table 1.** List of *Pca* isolates collected across Australia.

| Isolate <sup>1</sup> | City        | State | Collection date | 10-letter race (pathotype) |
|----------------------|-------------|-------|-----------------|----------------------------|
| 22VIC01-01           | Melbourne   | VIC   | 01/09/2022      | BFDQLHBCQB                 |
| 22WA02-01            | Geraldton   | WA    | 09/09/2022      | BDLQLBLCQB                 |
| 22WA09-01            | Greenough   | WA    | 13/09/2022      | BFLGMBBCQB                 |
| 22SA10-01            | Virginia    | SA    | 20/09/2022      | BDQGCBCBQB                 |
| 22SA11-01            | Barabba     | SA    | 20/09/2022      | BKQQCLBCQB                 |
| 22SA12-01            | Mallala     | SA    | 20/09/2022      | BFDQLMBCQB                 |
| 22WA15-01*           | Corrigin    | WA    | 01/10/2022      | BFBQLBBCQB                 |
| 22WA22-01            | Karranadgin | WA    | 06/10/2022      | BKDGLHBCQB                 |
| 22WA25-01*           | Watercarrin | WA    | 06/10/2022      | BFBQLBBCQB                 |
| 22WA27-01            | Bruce Rock  | WA    | 06/10/2022      | BFDQLCLCQB                 |
| 22WA29-01            | Hyden       | WA    | 06/10/2022      | BDLQCCBCQB                 |
| 22WA30-01            | Holt Rock   | WA    | 12/10/2022      | BFLQMBBCQB                 |
| 22WA31-01**          | Myalup      | WA    | 12/10/2022      | BFLGLBBCQB                 |
| 22NSW38-01           | Wagga Wagga | NSW   | 14/10/2022      | MQBSBBPFQB                 |
| 22WA43-01            | Perth City  | WA    | 14/10/2022      | LFDGLRBCQB                 |
| 22WA45-01            | Dumbarton   | WA    | 13/10/2022      | BKLQCCCLCQB                |
| 22WA46-01            | Dale        | WA    | 13/10/2022      | BJLQBCLCQB                 |
| 22WA47-01            | Northam     | WA    | 13/10/2022      | BFBQLMBCQB                 |
| 22NSW48-01           | Wagga Wagga | NSW   | 21/10/2022      | MQBNBBPFLB                 |
| 22VIC49-01****       | Horsham     | VIC   | 17/10/2022      | BFDGLHBCQB                 |
| 22WA50-01            | Cascade     | WA    | 06/10/2022      | QJBQRBLCQB                 |
| 22WA53-01            | Highbury    | WA    | 19/10/2022      | BDBQBCBCQB                 |
| 22WA54-01            | Roelands    | WA    | 19/10/2022      | GDQLQBCBCQB                |
| 22WA55-01            | Dalwallinu  | WA    | 21/10/2022      | BFB BBBBCLB                |
| 22VIC67-01****       | Trawalla    | VIC   | 26/10/2022      | BFDGLHBCQB                 |
| 22VIC71-01           | Culgoa      | VIC   | 28/10/2022      | BFBGLMLCGB                 |
| 22VIC74-01****       | Dookie      | VIC   | 28/10/2022      | BFDGLHBCQB                 |
| 22NSW75-01           | Brocklesby  | NSW   | 28/10/2022      | BFDQBHBCGB                 |
| 22NSW76-01****       | Holbrook    | NSW   | 28/10/2022      | BFDGLHBCQB                 |
| 22NSW79-01           | Balranald   | NSW   | 30/10/2022      | TQRPLLTFLB                 |
| 22NSW84-01           | Young       | NSW   | 02/11/2022      | BFDGBMBCLB                 |
| 22WA86-01            | Wialki      | WA    | 30/09/2022      | BDLGMBBCQB                 |
| 22WA88-01**          | Gibson      | WA    | 09/11/2022      | BFLGLBBCQB                 |
| 22WA89-01            | Gibson      | WA    | 09/11/2022      | BPLQMBNCQB                 |
| 22SA93-01            | Urrbrae     | SA    | 21/10/2022      | MSBJLLSMQG                 |
| 22NSW97-01***        | Canowindra  | NSW   | 03/11/2022      | GBBQBBLFLB                 |
| 22NSW103-01          | Coolah      | NSW   | 03/11/2022      | TQMPNLTPMR                 |
| 22NSW107-01          | Bellata     | NSW   | 04/11/2022      | BBBQBBLFLB                 |
| 22QLD110-01***       | Goondiwindi | QLD   | 04/11/2022      | GBBQBBLFLB                 |
| 22QLD114-01          | Kingaroy    | QLD   | 14/11/2022      | FLMPLLKTLJ                 |
| 22QLD116-01          | Toowoomba   | QLD   | 14/11/2022      | PQPPLLTPLG                 |
| 22VIC117-01          | Jeparit     | VIC   | 08/11/2022      | HLPNDLTFNB                 |
| 22QLD118-01          | Warwick     | QLD   | 16/11/2022      | TQRPM LTKLD                |
| 22NSW121-01          | Wagga Wagga | NSW   | -               | BCDQLHBCQB                 |
| 22NSW123-01          | Heatherbrae | NSW   | 07/10/2022      | TQMPLLTPMR                 |
| 22VIC126-01          | Horsham     | VIC   | 11/11/2022      | RQMSLLTFLB                 |
| 22VIC128-01          | Crowlands   | VIC   | 07/11/2022      | GBBRBBLFLB                 |
| 22VIC129-01          | Elmhurst    | VIC   | 07/11/2022      | CKFQM HBFQB                |

<sup>1</sup> \* , \*\* , \*\*\* , \*\*\*\* indicate isolates with identical race codes.

383 **Figure 1.** Virulence profile of a subset of 48 Australian *Puccinia coronata* f. sp.  
 384 *avenae* (*Pca*) isolates from across the country. **A)** Barplots showing the proportion of  
 385 cumulative infection types across the 40 USA differential lines for 48 Australian  
 386 (West = WA; East = QLD, NSW, SA, and VIC) and 152 USA *Pca* isolates. **B)**  
 387 Heatmap showing virulence profiles of isolates collected in 2022 (x-axis) on USA  
 388 differential lines and cultivars used in Australian surveys (y-axis). High infection  
 389 scores are shown in red indicating high virulence (susceptibility) and lower scores  
 390 (yellow/orange) indicate avirulence (resistance). Columns are ordered by hierarchical  
 391 clustering divided by region (West = WA; East = QLD, NSW, SA, and VIC). Heatmap  
 392 was constructed using the R package 'ComplexHeatmap' (Gu 2016).

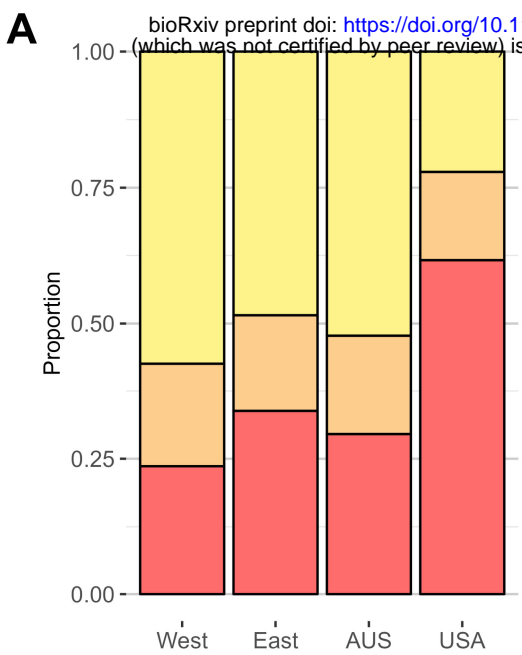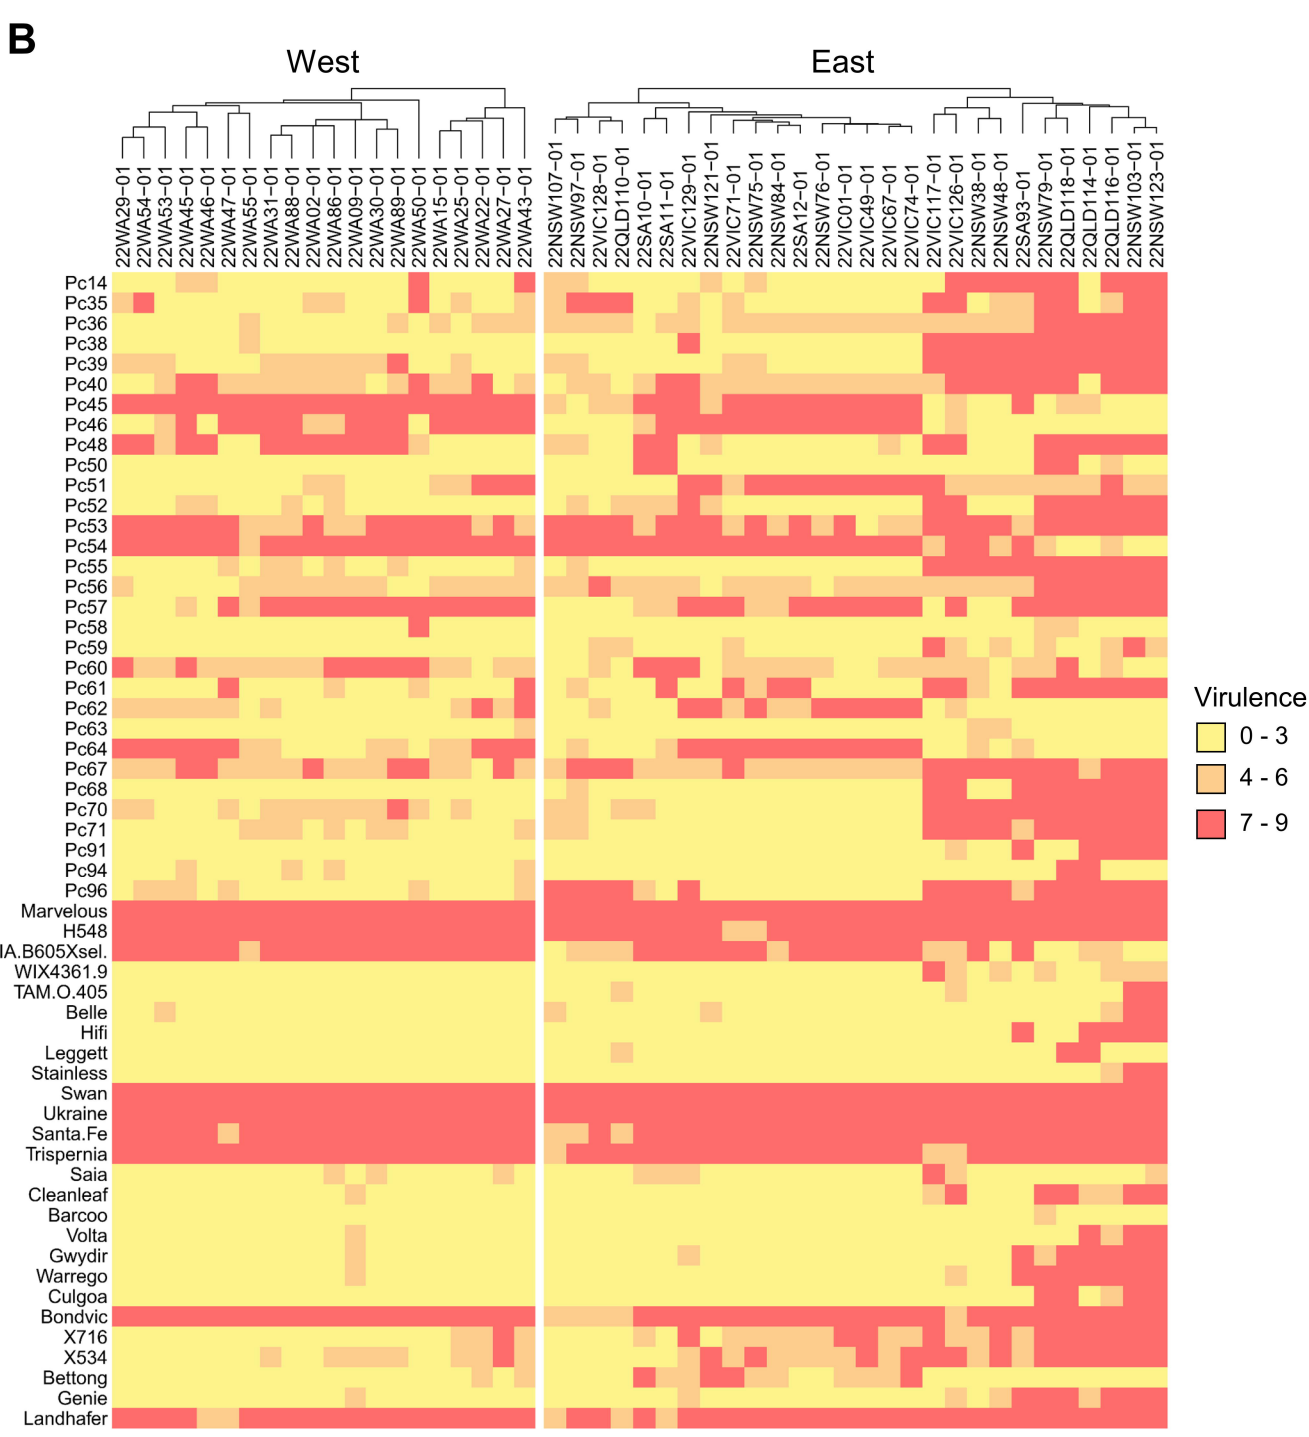

Source: https://www.biorxiv.org/content/biorxiv/early/2024/01/02/2023.09.24.558528.full.pdf
